# Supplementary material for: Integrated network pharmacology and fecal metabolomic analysis of the combinational mechanisms of Shexiang Baoxin Pill against atherosclerosis
Source: Royal Society of Chemistry journal article supplement (doi:10.1039/d3mo00067b), 2023-05-23
Supplement: d3mo00067b2.pdf [file d3mo00067b2.pdf]

**Supplementary Table S1:** Active compounds and corresponding target

| Drug | Compound                                                                                               | Target                                                                                                                                                                                                                                                                                                                                                                                                                                                                                                                                                                                                                                                                                                                                                                                                                                                                                                |
|------|--------------------------------------------------------------------------------------------------------|-------------------------------------------------------------------------------------------------------------------------------------------------------------------------------------------------------------------------------------------------------------------------------------------------------------------------------------------------------------------------------------------------------------------------------------------------------------------------------------------------------------------------------------------------------------------------------------------------------------------------------------------------------------------------------------------------------------------------------------------------------------------------------------------------------------------------------------------------------------------------------------------------------|
| BS   | Borneol, Isoborneol                                                                                    | TRPV3, OPRK1, TRPM8, TRPA1, KCNK4, ESRRG, COX6C, COX5B, COX7C, MT-CO1, AKR1C2, COX5A, MT-CO3, AR, COX7A1, FECH, COX4I1, PLA2G1B, COX6A2, ADH1C, COX6B1, FABP6, CES1, COX7B, MT-CO2, COX8A, NR1H4, CACNA1C, CACNA1D, CACNA1F, CACNA1S, CACNB1, CACNB2, CACNB3, CACNB4, GABRA1, GABRA2, GABRA3, GABRA4, GABRA5, GABRA6, GABRB1, GABRB2, GABRB3, GABRD, GABRE, GABRG1, GABRG2, GABRG3, GABRP, GABRQ, VDR, AKR1D1, ESR1, ESR2, HSD17B1, HSD17B11, IGHG2, NR3C2, SULT2A1, NR1I3, LSS, SLC6A2, PTGS2, PTGS1, NCOA2, MAOB, IGHG1, CHRM2, PGR, CHRM3, CHRM1, ADRA1D                                                                                                                                                                                                                                                                                                                                           |
| BV   | Bufotenidine, Bufotenine, Bufothionine, Cinobufagin, Dehydrobufotenine, Gamabufotalin, Telocinobufagin | CALR, NQO2, MTNR1A, HTR1B, ESR1, MTNR1B, ASMT, MPO, HTR1D, HTR1F, CALM2, CALM3, CALM1, EPX, SCNN1A, KCNJ8, ADRA1A, SCN1A, SCNN1G, HTR2A, ADRB2, ACACB, MTAP, ADRA2A, TLR8, ADRB1, APRT, ADRA1D, PECR, HRH1, PRKAA1, HTR7, HRH2, ADRA1B, SCNN1D, ADRA2C, AOC3, P4HA1, SRPK2, TLR7, KCNJ1, AGTR1, ADRB3, ACP1, SCNN1B, CYP2B6, ADRA2B, SLC6A2, SAXO1, SCT, UGCG, PHKG2, APLP1, ADK, ACACA, CHRNA7, PNP, ARRB2, RAB7A, PRKAA2, HTR2C, HSP90AB1, ALDH3A2, INS, CALCOCO2, SLC22A1, AOC2, ARRDC3, CALCA, HPRT1, ACTN2, NR3C1, PDE7B, PDE5A, PDE9A, PDE4A, RYR1, CYP17A1, PDE3A, ADORA2A, ITPR1, PDE6A, PRKDC, PIK3CD, PDE3B, PGD, PIK3CA, ADORA2B, PDE1A, PDE4D, PGR, PIK3CB, ITPR2, PDE1B, OPRK1, PDE7A, ITPR3, POLA2, PDE4C, PDE10A, PDE1C, ATM, PDE6B, PDE4B, PDE2A, ADORA1, CYP19A1, PDE8B, NT5E, HDAC2, PDE6C, PDE11A, PDE8A, NR3C2, RINT1, RIPK1, PIK3R1, WNT4, TACR2, AMPD3, CX3CR1, ADA, HAP1, IDNK |
| BCA  | (8S,9S,10R,13S,14R,17S)-17-(2-                                                                         | RXRA, PGR, NR3C2, NCOA2, NCOA1, PPARG, PTGS1, PTGS2, ALOX5, APOA2, SERPINE1,                                                                                                                                                                                                                                                                                                                                                                                                                                                                                                                                                                                                                                                                                                                                                                                                                          |

Hydroxyacetyl)-  
10,13-dimethyl-  
1,2,6,7,8,9,11,12,14  
,15,16,17-  
dodecahydrocyclop  
enta[a]phenanthren-  
3-one, Biliverdin,  
Chenodeoxycholic  
acid, Cholalic Acid,  
Cholesterol, Cholic  
acid, Deoxycholic  
acid,  
Deoxycorticosteron  
e, Hyodeoxycholic  
acid, Methyl  
desoxycholate, Tyr-  
Gly,  
Ursodeoxycholic  
acid

IL1B, IL13, LDLR, NR1H4, MT-CO2, FABP6,  
FECH, COX6A2, ESRRG, ADH1C, MT-CO1,  
COX8A, COX5B, COX6B1, CES1, PLA2G1B,  
COX6C, COX5A, MT-CO3, AKR1C2, COX7B,  
COX7C, COX7A1, COX4I1, ADH1A, AKR1C1,  
ABCB4, ATCAY, AKR1C3, AKR1C4, ADH1B,  
AKR1D1, AR, SRD5A2, TYR, ADH7, ALAD,  
EIF2AK1, PLAT, GRIN2A, SCN10A, SCN1B,  
ADORA1, CACNA1A, SCN7A, SCN11A,  
ACADSB, ABAT, GRIN2C, TOP1, OGDH,  
HDAC9, CACNA2D1, SCN8A, SCN5A,  
ALDH5A1, GRIN2D, PLG, CACNA1B, SCN2B,  
GRIN3B, SCN1A, GRIN2B, SCN4B, SCN3A,  
GRIN3A, SCN9A, CACNA2D2, SCN3B, SCN4A,  
SCN2A, HDAC2, GRIN1, SLCO1B3, SLC2A4,  
SLC10A2, PPARA, NR0B2, MTPP, JUN, ICAM1,  
HNF4A, HMGCR, CYP7A1, ABCB11, ACOT8,  
ADCYAP1, ADCYAP1R1, ADM, ADM2,  
ADORA2A, ADORA2B, ADRB1, ADRB2,  
ADRB3, ALB, AVP, AVPR2, CALCA, CALCB,  
CASP3, CASP9, CEL, CETP, CRH, CRHR1,  
CRHR2, CYP3A4, DRD5, FSHR, GCG, GCGR,  
GHRH, GHRHR, GIP, GIPR, GLP1R, GLP2R,  
GNAS, GNG2, GPBAR1, HRH2, HSD11B1,  
HTR4, HTR6, HTR7, IAPP, IL2, LHCGR, MC1R,  
MC2R, MC3R, MC4R, MC5R, NPS, NPSR1,  
POMC, PRKCA, PTGDR, PTGER2, PTGER4,  
PTGIR, PTH, PTH1R, PTH2, PTH2R, PTHLH,  
RXFP1, RXFP2, SCT, SCTR, SLC27A5,  
SLCO1A2, TAAR1, TSHR, VIP, VIPR1, VIPR2,  
FABP1, RBP2, SLCO1B1, VDR, CYP27B1, GC,  
SNW1, ESR1, TRPV3, OPRK1, TRPM8, TRPA1,  
SRD5A1, CYP17A1, NR3C1, ANXA1, SLC8A1,  
F12, PRLR, TRPV1, FADS2, FADS1, ELOVL4,  
OPRD1, OPRM1, CASP8, GABRA1, GABRA2,  
GABRA4, GABRA5, GABRA6, GABRE,  
GABRG1, GABRG2, GABRG3, MTRR, NOS1,  
NOS2, NOS3, POR, PRKCB

GRE 20-  
Glucosylginsenosid  
e Rf, Ginsenoside  
F1, Ginsenoside F4,  
Ginsenoside I,  
Ginsenoside Ia,  
SLCO1B3, ATP1A1, ATP1A2, ATP1A3, VDR,  
PPP1CC, GABRB3, GLRA3, IL1B, IL6, NFKB1,  
NFKB2, TNF, YWHAE, NR3C1, CASP3,  
HSD11B1, LPL, ANXA1, HSD11B2, HSD3B1,  
AKT1, ATF1, CREB1, MAPK1, MAPK14,  
MAPK3, NOS3, BDNF, CHRFA7A, CHRNA2,

|                       |      |                                          |
|-----------------------|------|------------------------------------------|
| Ginsenoside           | Ib,  | CHRNA3, CHRNA4, CHRNA6, CHRNA7,          |
| Ginsenoside           | Ic,  | CHRN2, CHRN4, FOS, SLC2A4, PTGS2,        |
| Ginsenoside           | Ii,  | NFKBIA, ADCYAP1                          |
| Ginsenoside           | Iii, |                                          |
| Ginsenoside           | La,  |                                          |
| Ginsenoside           | R0,  |                                          |
| Ginsenoside           | Ra0, |                                          |
| Ginsenoside           | Ra1, |                                          |
| Ginsenoside           | Ra2, |                                          |
| Ginsenoside           | Ra3, |                                          |
| Ginsenoside           | Rb1, |                                          |
| Ginsenoside           | Rb2, |                                          |
| Ginsenoside           | Rb3, |                                          |
| Ginsenoside           | Rc,  |                                          |
| Ginsenoside           | Rd,  |                                          |
| Ginsenoside           | Re,  |                                          |
| Ginsenoside           | Rf,  |                                          |
| Ginsenoside           | Rg1, |                                          |
| Ginsenoside           | Rg2, |                                          |
| Ginsenoside           | Rg3, |                                          |
| Ginsenoside           | Rh1, |                                          |
| Ginsenoside           | Rh2, |                                          |
| Ginsenoside           | Rh3, |                                          |
| Ginsenoside           | Rh4, |                                          |
| Ginsenoside           | Rs1, |                                          |
| Ginsenoside           | Rs2, |                                          |
| Malonylginsenosid     |      |                                          |
| e                     | Rb2, |                                          |
| Pseudoginsenoside     |      |                                          |
| F11,                  |      |                                          |
| Quinquenoside         | R1   |                                          |
| CC (-)-alpha-cedrene, |      | RXRA, PTGS2, NCOA2, GABRA2, GABRA1,      |
| (-)-Aromadendrene,    |      | CHRM3, CHRM1, LYZ, CHRM2, SOAT1, MTTP,   |
| (-)-Epicatechin-3-    |      | SOAT2, GABRA3, CHRNA7, CHRNA2,           |
| O-Gallate,            | (-)- | ADRA1B, FSHR, PGD, AHR, DHFRL1, DNMT1,   |
| Sativene,             | (+)- | ACTB, ATP5A1, ATP5B, ATP5C1, CBR1,       |
| epicatechin-3-o-      |      | CEBPB, CSNK2A1, CSNK2B, CYP1B1, EIF3F,   |
| gallate,              |      | ESR1, ESR2, HCK, HIBCH, HSP90AA1, HSPA2, |
| [Epicatechin-         |      | JAK1, NQO2, NR1I2, PIK3CG, PIM1, RUVBL2, |
| (4beta->8)]5-         |      | SF3B3, SHBG, STK17B, UBA1, UGT3A1, CDK6, |
| epicatechin,          | 6-   | AR, AKR1C3, BCHE, SCN10A, ACHE, COLQ,    |
| Glucopyranosylpro     |      | SLC6A4, SLC6A3, PKIA, ADRB2, ADRB1,      |
| cyandin               | B1,  | SLC6A2, GABRA6, F2, TRPV3, OPRK1, TRPM8, |
| Benzyl benzoate,      |      | TRPA1, CASP3, CASP8, MAPK1, MAPK14,      |

|                                                                                                                                                                                                                                                                                                                                                                                                                                                                                                                                          |                                                                                                                                                                                                                                                                                                                                                                                                                                                                                                                                                                                                                                                                                                                                                                                                                                                                                                                                                                                                                                                                                                                                                                     |
|------------------------------------------------------------------------------------------------------------------------------------------------------------------------------------------------------------------------------------------------------------------------------------------------------------------------------------------------------------------------------------------------------------------------------------------------------------------------------------------------------------------------------------------|---------------------------------------------------------------------------------------------------------------------------------------------------------------------------------------------------------------------------------------------------------------------------------------------------------------------------------------------------------------------------------------------------------------------------------------------------------------------------------------------------------------------------------------------------------------------------------------------------------------------------------------------------------------------------------------------------------------------------------------------------------------------------------------------------------------------------------------------------------------------------------------------------------------------------------------------------------------------------------------------------------------------------------------------------------------------------------------------------------------------------------------------------------------------|
| <p>beta-Cubebene,<br/>Caryophyllene<br/>oxide,<br/>Cinnamaldehyde,<br/>Cinnamic Acid,<br/>Cinnamyl<br/>Benzoate, copaene,<br/>Diisobutyl<br/>phthalate, junipene,<br/>Ledene, Linoleic<br/>acid,<br/>Melilotocarpan A,<br/>Oleic Acid,<br/>Procyanidin B1,<br/>Procyanidin B5,<br/>Procyanidin B7,<br/>zoomaric acid</p>                                                                                                                                                                                                                 | <p>MAPK3, MAPK8, MTRR, NOS1, NOS2, NOS3,<br/>POR, SLC2A4, TXNRD1, TRPV4, TRPV1, TLR4,<br/>RELA, NFKBIA, NFE2L2, IRF3, C5AR1, PPARG,<br/>AGTR1, APOA2, IL1B, TNF, IL13, ACTN2, DAO,<br/>HRSP12, PRDX5, RAB9A, SLC15A1, CTSB,<br/>ADIPOQ, FURIN, HAL, KDM1A, MBTPS1,<br/>PCSK1, PCSK2, PCSK4, PCSK5, PCSK7, PCSK9,<br/>RSPO1, RSPO3, RSPO4, TPP2, PTGS1, MGAM,<br/>MAOB, MAOA, F3, GABRD, GABRB1,<br/>GABRG3, GABRE, GABRG1, GABRP, GABRA4,<br/>GABRB2, GABRQ, GABRB3, GABRA5,<br/>GABRG2, ADRA2B, PGR, NR3C2, NR3C1,<br/>HTR2A, IGHG1, PRKCA, ALOX5, PRKCB,<br/>SERPINE1, RBP2, PPARA, PLG, MPO, LPL, INS,<br/>HMGCR, GCG, FABP1, CETP, BDNF</p>                                                                                                                                                                                                                                                                                                                                                                                                                                                                                                                     |
| <p>MA 5alpha-androstan-<br/>3,17-dione,<br/>Cholesterol,<br/>Cyclotetradecan-1-<br/>One, Muscol,<br/>Muscone,<br/>Muscopyridine,<br/>Normuscone,<br/>5beta-androstan-<br/>3,17-dione,<br/>3alpha,17beta-<br/>Dihydroxy-5alpha-<br/>androstan-3,17-<br/>Hydroxy-5alpha-<br/>Androstan-17-One,<br/>3alpha-hydroxy-<br/>5beta-androstan-17-<br/>one, 3beta-<br/>Hydroxy-5alpha-<br/>Androstan-17-One,<br/>3beta-hydroxy-<br/>androst-5-ene-17-<br/>one, 5beta-<br/>androstan-<br/>3alpha,17beta-diol,<br/>5-Cis-<br/>Cyclotetradecen-1-</p> | <p>SHBG, AKR1C1, AKR1C3, AKR1C4, AR,<br/>HSD17B1, SRD5A1, VDR, CYP27B1, GC, SNW1,<br/>ESR1, PGR, SCN11A, SCN2B, ABAT, SCN1A,<br/>SCN3B, SCN3A, SCN7A, SCN5A, SCN10A,<br/>AKR1D1, ALDH5A1, SCN2A, HDAC9, TYR,<br/>SCN9A, SCN4A, SCN4B, SRD5A2, ACADSB,<br/>SCN8A, SCN1B, OGDH, HDAC2, TRPV3,<br/>OPRK1, TRPM8, TRPA1, KCNK4, GABRB2,<br/>GABRB3, F2, GPR27, RDH16, ESRRG, COX6C,<br/>COX5B, COX7C, MT-CO1, AKR1C2, COX5A,<br/>MT-CO3, COX7A1, FECH, COX4I1, PLA2G1B,<br/>COX6A2, ADH1C, COX6B1, FABP6, CES1,<br/>COX7B, MT-CO2, COX8A, NR1H4, CACNA2D1,<br/>PLAT, CACNA1A, GRIN3B, CACNA2D2,<br/>GRIN2A, PLG, CACNA1B, GRIN2C, GRIN2B,<br/>GRIN3A, GRIN2D, ADORA1, GRIN1,<br/>HSD17B11, SULT2A1, NQO1, PDE7B, PDE5A,<br/>PDE9A, PDE4A, RYR1, CYP17A1, PDE3A,<br/>ADORA2A, ITPR1, PDE6A, PRKDC, PIK3CD,<br/>PDE3B, PGD, PIK3CA, ADORA2B, PDE1A,<br/>PDE4D, PIK3CB, ITPR2, PDE1B, PDE7A, ITPR3,<br/>POLA2, PDE4C, PDE10A, PDE1C, ATM, PDE6B,<br/>PDE4B, PDE2A, CYP19A1, PDE8B, NT5E,<br/>PDE6C, PDE11A, PDE8A, NR3C2, RINT1, RIPK1,<br/>PIK3R1, WNT4, TACR2, AMPD3, CX3CR1,<br/>ADA, HAP1, IDNK, SLC8A1, F12, TRPV1,<br/>FADS2, FADS1, PTGS1, PTGS2, ELOVL4, PRLR,</p> |

|    |                                                                                                                                                                                                                                                                                                                                                                                                                                                                                                                      |                                                                                                                                                                                                                                                                                                                                                                                                                                                                                                                                                                                                                                                                                                                                                                                                                                                                                                                                                                                                                                                                                                                                                                                                                                                               |
|----|----------------------------------------------------------------------------------------------------------------------------------------------------------------------------------------------------------------------------------------------------------------------------------------------------------------------------------------------------------------------------------------------------------------------------------------------------------------------------------------------------------------------|---------------------------------------------------------------------------------------------------------------------------------------------------------------------------------------------------------------------------------------------------------------------------------------------------------------------------------------------------------------------------------------------------------------------------------------------------------------------------------------------------------------------------------------------------------------------------------------------------------------------------------------------------------------------------------------------------------------------------------------------------------------------------------------------------------------------------------------------------------------------------------------------------------------------------------------------------------------------------------------------------------------------------------------------------------------------------------------------------------------------------------------------------------------------------------------------------------------------------------------------------------------|
|    | One, Androst-4-<br>Ene-3,17-Dione,<br>Androsterone                                                                                                                                                                                                                                                                                                                                                                                                                                                                   | NR3C1, ANXA1                                                                                                                                                                                                                                                                                                                                                                                                                                                                                                                                                                                                                                                                                                                                                                                                                                                                                                                                                                                                                                                                                                                                                                                                                                                  |
| SX | (1Ar,4R,7R,7bS)-<br>1,1,4,7-<br>Tetramethyl-<br>1a,2,3,4,5,6,7,7b-<br>octahydro-1H-<br>cyclopropa[e]azule<br>ne,<br>(3R,3aR,6R,7S,8aS<br>)-3,6,8,8-<br>tetramethylhexahyd<br>ro-1H-3a,7-<br>methanoazulen-<br>5(4H)-one, 1,3-<br>diinethylbenzene,<br>3-Epioleanolic<br>Acid, alpha-pinene,<br>Androstane, Benzyl<br>benzoate,<br>Cinnamaldehyde,<br>Cinnamein,<br>Cinnamic Acid,<br>copaene,<br>Isolapachol,<br>Isopimaric acid,<br>Linoleic acid, musk<br>ambrette, Oleanolic<br>Acid, Oleanonic<br>Acid, Styracin | CHRM3, CHRM2, GABRA1, ACHE, HSD11B1,<br>AR, NPPB, ESR1, HSD11B2, NFKB1, NFKB2,<br>NR3C1, AKR1C1, AKR1C2, NCOA2, NR1I2,<br>NR3C2, PGR, SULT2B1, PRLR, VDR, LSS, ESR2,<br>GABRA2, GABRA3, GABRA4, GABRA5,<br>GABRA6, GABRB1, GABRB2, GABRB3,<br>GABRD, GABRE, GABRG1, GABRG2, GABRG3,<br>GABRP, GABRQ, GRIN1, GRIN2A, GRIN2B,<br>GRIN2C, GRIN2D, GRIN3A, GRIN3B, HSD17B1,<br>NR1I3, PPARA, SULT2A1, IGHG2, ADH1C,<br>CES1, COX4I1, COX5A, COX5B, COX6A2,<br>COX6B1, COX6C, COX7A1, COX7B, COX7C,<br>COX8A, ESRRG, FABP6, FECH, GPBAR1, MT-<br>CO1, MT-CO2, MT-CO3, NR1H4, PLA2G1B,<br>SHBG, CYP2B6, CHRM1, BCHE, SCN10A,<br>COLQ, SLC6A4, SLC6A3, PKIA, ADRB2,<br>ADRB1, CASP3, CASP8, MAPK1, MAPK14,<br>MAPK3, MAPK8, MTRR, NOS1, NOS2, NOS3,<br>POR, PTGS2, SLC2A4, TXNRD1, TRPV4,<br>TRPV1, TLR4, RELA, NFKBIA, NFE2L2, IRF3,<br>C5AR1, MAOB, LTA4H, DAO, HRSP12, PRDX5,<br>RAB9A, SLC15A1, CTSB, ADIPOQ, FURIN,<br>HAL, KDM1A, MBTPS1, PCSK1, PCSK2, PCSK4,<br>PCSK5, PCSK7, PCSK9, RSPO1, RSPO3, RSPO4,<br>TPP2, PTGS1, MGAM, MAOA, LYZ, F3, RXRA,<br>ADRA1B, PIM1, PDE3A, HSP90AA1, NCOA1,<br>SLC6A2, IGHG1, NQO1, ICAM1, CASP9,<br>SRD5A1, CYP17A1, SLC8A1, F12, PTGER1,<br>PTGER4, OPRK1, FADS2, FADS1, PTGER2,<br>PTGER3, ELOVL4, ANXA1, ALOX5, ADRA2B |

**Supplementary Table S2: Targets prediction of SBP on AS**

| Drug | Target                                                                                                                                                                                                                                                                                                                                                                                              |
|------|-----------------------------------------------------------------------------------------------------------------------------------------------------------------------------------------------------------------------------------------------------------------------------------------------------------------------------------------------------------------------------------------------------|
| SBP  | MT-CO1, COX5A, AR, PLA2G1B, ADH1C, CES1, MT-CO2, COX8A,<br>NR1H4, CACNA1C, VDR, ESR1, ESR2, NR3C2, SULT2A1, NR1I3,<br>PTGS2, PTGS1, NCOA2, MAOB, CHRM3, CALR, MTNR1B, MPO,<br>CALM2, CALM3, CALM1, SCNN1A, ADRA1A, SCNN1G, HTR2A,<br>ADRB2, ADRB1, APRT, HRH1, PRKAA1, AOC3, TLR7, AGTR1,<br>ADRB3, SCNN1B, CYP2B6, ADRA2B, ADK, ACACA, PRKAA2,<br>HSP90AB1, INS, AOC2, CALCA, ACTN2, NR3C1, PDE5A, |

---

|     |                                                                                                                                                                                                                                                                                                                                                                                                                                                                                                                                                                                                                                                                                                                                                                                                                                                             |
|-----|-------------------------------------------------------------------------------------------------------------------------------------------------------------------------------------------------------------------------------------------------------------------------------------------------------------------------------------------------------------------------------------------------------------------------------------------------------------------------------------------------------------------------------------------------------------------------------------------------------------------------------------------------------------------------------------------------------------------------------------------------------------------------------------------------------------------------------------------------------------|
|     | ADORA2A, PRKDC, PIK3CD, PIK3CA, ADORA2B, PDE4D, PIK3CB, ATM, CYP19A1, NT5E, HDAC2, PIK3R1, CX3CR1, ADA, RXRA, PPARG, ALOX5, APOA2, SERPINE1, IL1B, IL13, LDLR, ADH1B, PLAT, TOP1, HDAC9, CACNA2D1, SCN5A, PLG, SLC01B3, SLC2A4, SLC10A2, PPARA, MTTP, JUN, ICAM1, HNF4A, HMGCR, CYP7A1, ABCB11, ADM, ALB, CASP3, CASP9, CEL, CETP, CYP3A4, GCG, GHRHR, GIP, GLP1R, GNAS, GPBAR1, HSD11B1, IL2, MC1R, MC4R, POMC, PRKCA, PTGIR, PTH, SLC01A2, SLC01B1, CYP27B1, GC, ANXA1, F12, TRPV1, FADS1, CASP8, MTRR, NOS1, NOS2, NOS3, PRKCB, IL6, NFKB1, NFKB2, TNF, LPL, AKT1, CREB1, MAPK1, MAPK14, MAPK3, BDNF, CHRNA4, FOS, NFKBIA, SOAT1, SOAT2, AHR, DNMT1, ACTB, HSP90AA1, JAK1, NR1I2, PIK3CG, SHBG, F2, MAPK8, TXNRD1, TRPV4, TLR4, RELA, NFE2L2, IRF3, C5AR1, PRDX5, SLC15A1, CTSB, ADIPOQ, FURIN, MBTPS1, PCSK2, PCSK5, PCSK9, MAOA, F3, NPPB, LTA4H, NQO1 |
| BS  | MT-CO1, COX5A, AR, PLA2G1B, ADH1C, CES1, MT-CO2, COX8A, NR1H4, CACNA1C, VDR, ESR1, ESR2, NR3C2, SULT2A1, NR1I3, PTGS2, PTGS1, NCOA2, MAOB, CHRM3                                                                                                                                                                                                                                                                                                                                                                                                                                                                                                                                                                                                                                                                                                            |
| BV  | CALR, ESR1, MTNR1B, MPO, CALM2, CALM3, CALM1, SCNN1A, ADRA1A, SCNN1G, HTR2A, ADRB2, ADRB1, APRT, HRH1, PRKAA1, AOC3, TLR7, AGTR1, ADRB3, SCNN1B, CYP2B6, ADRA2B, ADK, ACACA, PRKAA2, HSP90AB1, INS, AOC2, CALCA, ACTN2, NR3C1, PDE5A, ADORA2A, PRKDC, PIK3CD, PIK3CA, ADORA2B, PDE4D, PIK3CB, ATM, CYP19A1, NT5E, HDAC2, NR3C2, PIK3R1, CX3CR1, ADA                                                                                                                                                                                                                                                                                                                                                                                                                                                                                                         |
| BCA | RXRA, NR3C2, NCOA2, PPARG, PTGS1, PTGS2, ALOX5, APOA2, SERPINE1, IL1B, IL13, LDLR, NR1H4, MT-CO2, ADH1C, MT-CO1, COX8A, CES1, PLA2G1B, COX5A, ADH1B, AR, PLAT, TOP1, HDAC9, CACNA2D1, SCN5A, PLG, HDAC2, SLC01B3, SLC2A4, SLC10A2, PPARA, MTTP, JUN, ICAM1, HNF4A, HMGCR, CYP7A1, ABCB11, ADM, ADORA2A, ADORA2B, ADRB1, ADRB2, ADRB3, ALB, CALCA, CASP3, CASP9, CEL, CETP, CYP3A4, GCG, GHRHR, GIP, GLP1R, GNAS, GPBAR1, HSD11B1, IL2, MC1R, MC4R, POMC, PRKCA, PTGIR, PTH, SLC01A2, SLC01B1, VDR, CYP27B1, GC, ESR1, NR3C1, ANXA1, F12, TRPV1, FADS1, CASP8, MTRR, NOS1, NOS2, NOS3, PRKCB                                                                                                                                                                                                                                                                 |
| GRE | SLC01B3, VDR, IL1B, IL6, NFKB1, NFKB2, TNF, NR3C1, CASP3, HSD11B1, LPL, ANXA1, AKT1, CREB1, MAPK1, MAPK14, MAPK3, NOS3, BDNF, CHRNA4, FOS, SLC2A4, PTGS2, NFKBIA                                                                                                                                                                                                                                                                                                                                                                                                                                                                                                                                                                                                                                                                                            |
| CC  | RXRA, PTGS2, NCOA2, CHRM3, SOAT1, MTTP, SOAT2, AHR, DNMT1, ACTB, ESR1, ESR2, HSP90AA1, JAK1, NR1I2, PIK3CG, SHBG, AR, ADRB2, ADRB1, F2, CASP3, CASP8, MAPK1, MAPK14, MAPK3, MAPK8, MTRR, NOS1, NOS2, NOS3, SLC2A4, TXNRD1, TRPV4, TRPV1, TLR4, RELA, NFKBIA, NFE2L2, IRF3, C5AR1,                                                                                                                                                                                                                                                                                                                                                                                                                                                                                                                                                                           |

|    |                                                                                                                                                                                                                                                                                                                                                                                                                                                                                                                                  |
|----|----------------------------------------------------------------------------------------------------------------------------------------------------------------------------------------------------------------------------------------------------------------------------------------------------------------------------------------------------------------------------------------------------------------------------------------------------------------------------------------------------------------------------------|
|    | PPARG, AGTR1, APOA2, IL1B, TNF, IL13, ACTN2, PRDX5, SLC15A1, CTSB, ADIPOQ, FURIN, MBTPS1, PCSK2, PCSK5, PCSK9, PTGS1, MAOB, MAOA, F3, ADRA2B, NR3C2, NR3C1, HTR2A, PRKCA, ALOX5, PRKCB, SERPINE1, PPARA, PLG, MPO, LPL, INS, HMGCR, GCG, CETP, BDNF                                                                                                                                                                                                                                                                              |
| MA | SHBG, AR, VDR, CYP27B1, GC, ESR1, SCN5A, HDAC9, HDAC2, F2, MT-CO1, COX5A, PLA2G1B, ADH1C, CES1, MT-CO2, COX8A, NR1H4, CACNA2D1, PLAT, PLG, SULT2A1, NQO1, PDE5A, ADORA2A, PRKDC, PIK3CD, PIK3CA, ADORA2B, PDE4D, PIK3CB, ATM, CYP19A1, NT5E, NR3C2, PIK3R1, CX3CR1, ADA, F12, TRPV1, FADS1, PTGS1, PTGS2, NR3C1, ANXA1                                                                                                                                                                                                           |
| SX | CHRM3, HSD11B1, AR, NPPB, ESR1, NFKB1, NFKB2, NR3C1, NCOA2, NR1I2, NR3C2, VDR, ESR2, NR1I3, PPARA, SULT2A1, ADH1C, CES1, COX5A, COX8A, GPBAR1, MT-CO1, MT-CO2, NR1H4, PLA2G1B, SHBG, CYP2B6, ADRB2, ADRB1, CASP3, CASP8, MAPK1, MAPK14, MAPK3, MAPK8, MTRR, NOS1, NOS2, NOS3, PTGS2, SLC2A4, TXNRD1, TRPV4, TRPV1, TLR4, RELA, NFKBIA, NFE2L2, IRF3, C5AR1, MAOB, LTA4H, PRDX5, SLC15A1, CTSB, ADIPOQ, FURIN, MBTPS1, PCSK2, PCSK5, PCSK9, PTGS1, MAOA, F3, RXRA, HSP90AA1, NQO1, ICAM1, CASP9, F12, FADS1, ANXA1, ALOX5, ADRA2B |

**Supplementary Table S3: Top 20 signaling pathways of each medicine in SBP**

| Medicine | Pathway                                           | P value  | FDR      |
|----------|---------------------------------------------------|----------|----------|
| MA       | Purine metabolism                                 | 1.37E-18 | 2.24E-16 |
|          | Morphine addiction                                | 4.34E-18 | 3.56E-16 |
|          | Metabolic pathways                                | 4.09E-17 | 2.23E-15 |
|          | Prion disease                                     | 8.57E-16 | 3.51E-14 |
|          | Cardiac muscle contraction                        | 3.76E-12 | 1.23E-10 |
|          | Chemical carcinogenesis - reactive oxygen species | 2.66E-11 | 7.28E-10 |
|          | Alzheimer disease                                 | 1.58E-10 | 3.71E-09 |
|          | Nicotine addiction                                | 3.59E-10 | 7.35E-09 |
|          | cAMP signaling pathway                            | 1.23E-09 | 2.24E-08 |
|          | Non-alcoholic fatty liver disease                 | 1.97E-09 | 3.22E-08 |
|          | Spinocerebellar ataxia                            | 5.22E-09 | 7.78E-08 |
|          | Pathways of neurodegeneration - multiple diseases | 6.73E-08 | 9.20E-07 |
|          | Diabetic cardiomyopathy                           | 9.51E-08 | 1.20E-06 |
|          | Steroid hormone biosynthesis                      | 3.76E-07 | 4.41E-06 |
|          | Calcium signaling pathway                         | 9.36E-07 | 1.02E-05 |
|          | Oxidative phosphorylation                         | 1.09E-06 | 1.12E-05 |
|          | Huntington disease                                | 1.16E-06 | 1.12E-05 |
|          | Inflammatory mediator regulation of TRP channels  | 2.75E-06 | 2.50E-05 |
|          | Amyotrophic lateral sclerosis                     | 3.42E-06 | 2.95E-05 |

|     |                                                      |          |          |
|-----|------------------------------------------------------|----------|----------|
|     | Parkinson disease                                    | 3.62E-06 | 2.97E-05 |
| GRE | TNF signaling pathway                                | 6.99E-14 | 4.68E-12 |
|     | IL-17 signaling pathway                              | 1.21E-11 | 4.07E-10 |
|     | C-type lectin receptor signaling pathway             | 3.39E-11 | 7.57E-10 |
|     | Cholinergic synapse                                  | 7.83E-11 | 1.31E-09 |
|     | cAMP signaling pathway                               | 2.36E-10 | 3.04E-09 |
|     | Osteoclast differentiation                           | 2.72E-10 | 3.04E-09 |
|     | AGE-RAGE signaling pathway in diabetic complications | 6.74E-10 | 6.45E-09 |
|     | Chagas disease                                       | 8.06E-10 | 6.75E-09 |
|     | Toll-like receptor signaling pathway                 | 9.60E-10 | 7.15E-09 |
|     | Pertussis                                            | 1.89E-09 | 1.27E-08 |
|     | Leishmaniasis                                        | 2.10E-09 | 1.28E-08 |
|     | Chemical carcinogenesis - receptor activation        | 2.48E-09 | 1.37E-08 |
|     | Hepatitis B                                          | 2.78E-09 | 1.37E-08 |
|     | Lipid and atherosclerosis                            | 2.87E-09 | 1.37E-08 |
|     | Human cytomegalovirus infection                      | 4.64E-09 | 2.07E-08 |
|     | Tuberculosis                                         | 7.73E-09 | 3.24E-08 |
|     | Yersinia infection                                   | 1.12E-08 | 4.42E-08 |
|     | Kaposi sarcoma-associated herpesvirus infection      | 1.59E-08 | 5.92E-08 |
|     | Insulin resistance                                   | 3.16E-08 | 1.11E-07 |
|     | Relaxin signaling pathway                            | 1.27E-07 | 4.27E-07 |
| SX  | Nicotine addiction                                   | 1.59E-29 | 2.10E-27 |
|     | Neuroactive ligand-receptor interaction              | 1.30E-20 | 8.61E-19 |
|     | Non-alcoholic fatty liver disease                    | 9.26E-14 | 4.07E-12 |
|     | Retrograde endocannabinoid signaling                 | 3.98E-13 | 1.31E-11 |
|     | Alzheimer disease                                    | 9.11E-13 | 2.40E-11 |
|     | Morphine addiction                                   | 1.64E-12 | 3.60E-11 |
|     | Chemical carcinogenesis - reactive oxygen species    | 2.03E-12 | 3.82E-11 |
|     | Prion disease                                        | 2.92E-12 | 4.82E-11 |
|     | Pathways of neurodegeneration - multiple diseases    | 8.21E-12 | 1.20E-10 |
|     | GABAergic synapse                                    | 1.60E-11 | 2.12E-10 |
|     | Cocaine addiction                                    | 3.63E-10 | 4.36E-09 |
|     | cAMP signaling pathway                               | 6.84E-10 | 7.53E-09 |
|     | Diabetic cardiomyopathy                              | 1.08E-09 | 1.09E-08 |
|     | Cardiac muscle contraction                           | 1.83E-09 | 1.73E-08 |
|     | Parkinson disease                                    | 9.22E-08 | 8.11E-07 |
|     | Lipid and atherosclerosis                            | 1.08E-07 | 8.88E-07 |
|     | Amyotrophic lateral sclerosis                        | 1.60E-07 | 1.24E-06 |
|     | Toxoplasmosis                                        | 3.51E-07 | 2.58E-06 |
|     | Amphetamine addiction                                | 2.08E-06 | 1.45E-05 |
|     | Pathways in cancer                                   | 2.35E-06 | 1.47E-05 |
| BCA | Neuroactive ligand-receptor interaction              | 1.31E-58 | 2.62E-56 |
|     | Nicotine addiction                                   | 7.09E-18 | 5.71E-16 |
|     | cAMP signaling pathway                               | 8.52E-18 | 5.71E-16 |

|    |                                                      |          |          |
|----|------------------------------------------------------|----------|----------|
|    | Bile secretion                                       | 2.32E-10 | 1.17E-08 |
|    | Morphine addiction                                   | 3.28E-10 | 1.32E-08 |
|    | Cardiac muscle contraction                           | 1.60E-09 | 5.35E-08 |
|    | Non-alcoholic fatty liver disease                    | 4.00E-09 | 1.15E-07 |
|    | Calcium signaling pathway                            | 1.09E-08 | 2.75E-07 |
|    | GABAergic synapse                                    | 1.96E-08 | 4.37E-07 |
|    | Prion disease                                        | 1.22E-07 | 2.46E-06 |
|    | Amphetamine addiction                                | 5.93E-07 | 1.08E-05 |
|    | Steroid hormone biosynthesis                         | 1.50E-06 | 2.51E-05 |
|    | Diabetic cardiomyopathy                              | 6.44E-06 | 9.96E-05 |
|    | Retrograde endocannabinoid signaling                 | 1.09E-05 | 1.57E-04 |
|    | Alzheimer disease                                    | 1.35E-05 | 1.81E-04 |
|    | Serotonergic synapse                                 | 1.76E-05 | 2.01E-04 |
|    | Cocaine addiction                                    | 1.79E-05 | 2.01E-04 |
|    | Circadian entrainment                                | 1.80E-05 | 2.01E-04 |
|    | Pathways of neurodegeneration - multiple diseases    | 2.20E-05 | 2.25E-04 |
|    | Chemical carcinogenesis - reactive oxygen species    | 2.23E-05 | 2.25E-04 |
| CC | Nicotine addiction                                   | 2.61E-19 | 2.95E-17 |
|    | Neuroactive ligand-receptor interaction              | 6.76E-18 | 3.82E-16 |
|    | Retrograde endocannabinoid signaling                 | 6.47E-16 | 2.44E-14 |
|    | GABAergic synapse                                    | 2.38E-14 | 6.72E-13 |
|    | Morphine addiction                                   | 3.51E-14 | 7.93E-13 |
|    | AGE-RAGE signaling pathway in diabetic complications | 4.15E-10 | 7.81E-09 |
|    | Toxoplasmosis                                        | 1.92E-09 | 2.99E-08 |
|    | IL-17 signaling pathway                              | 2.12E-09 | 2.99E-08 |
|    | Serotonergic synapse                                 | 2.74E-09 | 3.44E-08 |
|    | Lipid and atherosclerosis                            | 6.08E-09 | 6.87E-08 |
|    | Leishmaniasis                                        | 2.75E-08 | 2.83E-07 |
|    | Influenza A                                          | 6.66E-08 | 6.28E-07 |
|    | Chemical carcinogenesis - receptor activation        | 1.94E-07 | 1.68E-06 |
|    | Measles                                              | 2.51E-07 | 2.02E-06 |
|    | Pertussis                                            | 2.70E-07 | 2.03E-06 |
|    | Alcoholic liver disease                              | 3.22E-07 | 2.27E-06 |
|    | Chagas disease                                       | 5.26E-07 | 3.49E-06 |
|    | TNF signaling pathway                                | 1.35E-06 | 8.50E-06 |
|    | Hepatitis B                                          | 1.47E-06 | 8.74E-06 |
|    | Pathways in cancer                                   | 2.30E-06 | 1.30E-05 |
| BV | Purine metabolism                                    | 6.30E-25 | 1.03E-22 |
|    | Calcium signaling pathway                            | 1.94E-16 | 1.58E-14 |
|    | cGMP-PKG signaling pathway                           | 9.57E-16 | 5.20E-14 |
|    | Morphine addiction                                   | 5.72E-15 | 2.33E-13 |
|    | Renin secretion                                      | 2.30E-14 | 7.51E-13 |
|    | Neuroactive ligand-receptor interaction              | 7.82E-14 | 2.13E-12 |
|    | cAMP signaling pathway                               | 2.68E-11 | 6.25E-10 |

|    |                                                   |          |          |
|----|---------------------------------------------------|----------|----------|
|    | Aldosterone-regulated sodium reabsorption         | 1.54E-09 | 3.13E-08 |
|    | Inflammatory mediator regulation of TRP channels  | 1.11E-08 | 2.01E-07 |
|    | Insulin signaling pathway                         | 5.95E-08 | 8.95E-07 |
|    | Salivary secretion                                | 6.04E-08 | 8.95E-07 |
|    | Regulation of lipolysis in adipocytes             | 1.03E-07 | 1.39E-06 |
|    | Glucagon signaling pathway                        | 2.91E-07 | 3.65E-06 |
|    | Vascular smooth muscle contraction                | 3.75E-07 | 4.09E-06 |
|    | Metabolic pathways                                | 3.76E-07 | 4.09E-06 |
|    | Estrogen signaling pathway                        | 5.17E-07 | 5.26E-06 |
|    | Taste transduction                                | 3.18E-06 | 3.05E-05 |
|    | Phosphatidylinositol signaling system             | 8.67E-06 | 7.85E-05 |
|    | C-type lectin receptor signaling pathway          | 1.53E-05 | 1.32E-04 |
|    | Longevity regulating pathway - multiple species   | 2.51E-05 | 2.02E-04 |
| BS | Cardiac muscle contraction                        | 1.34E-24 | 1.14E-22 |
|    | GABAergic synapse                                 | 1.06E-22 | 4.50E-21 |
|    | Nicotine addiction                                | 3.29E-22 | 9.32E-21 |
|    | Retrograde endocannabinoid signaling              | 1.08E-19 | 2.29E-18 |
|    | Morphine addiction                                | 3.23E-16 | 5.49E-15 |
|    | Neuroactive ligand-receptor interaction           | 4.40E-12 | 6.24E-11 |
|    | Alzheimer disease                                 | 1.16E-10 | 1.41E-09 |
|    | Prion disease                                     | 3.83E-10 | 4.07E-09 |
|    | Oxidative phosphorylation                         | 6.47E-10 | 6.11E-09 |
|    | Non-alcoholic fatty liver disease                 | 3.49E-09 | 2.97E-08 |
|    | Pathways of neurodegeneration - multiple diseases | 4.38E-09 | 3.38E-08 |
|    | Chemical carcinogenesis - reactive oxygen species | 2.29E-08 | 1.62E-07 |
|    | Diabetic cardiomyopathy                           | 7.29E-08 | 4.77E-07 |
|    | Parkinson disease                                 | 1.83E-07 | 1.11E-06 |
|    | Thermogenesis                                     | 3.14E-07 | 1.78E-06 |
|    | Serotonergic synapse                              | 3.44E-07 | 1.83E-06 |
|    | Arrhythmogenic right ventricular cardiomyopathy   | 2.78E-06 | 1.39E-05 |
|    | Huntington disease                                | 5.84E-06 | 2.62E-05 |
|    | Taste transduction                                | 5.86E-06 | 2.62E-05 |
|    | Hypertrophic cardiomyopathy                       | 7.95E-06 | 3.38E-05 |

**Supplementary Table S4:** Enriched pathways based on the identified differential metabolites

| Group        | Pathway                                     | Rich factor | P value     |
|--------------|---------------------------------------------|-------------|-------------|
| model/N<br>C | ABC transporters                            | 0.11827957  | 0.000644763 |
|              | Adrenergic signaling in cardiomyocytes      | 0.3         | 0.005250671 |
|              | Alanine, aspartate and glutamate metabolism | 0.142857143 | 0.01990678  |
|              | Alcoholism                                  | 0.4         | 0.000346274 |

|               |                                                           |             |             |
|---------------|-----------------------------------------------------------|-------------|-------------|
|               | Amphetamine addiction                                     | 0.4         | 0.000346274 |
|               | Arginine and proline metabolism                           | 0.102564103 | 0.008598214 |
|               | Arginine biosynthesis                                     | 0.217391304 | 0.001403045 |
|               | beta-Alanine metabolism                                   | 0.125       | 0.031138825 |
|               | Butanoate metabolism                                      | 0.119047619 | 0.019977377 |
|               | Caffeine metabolism                                       | 0.181818182 | 0.008470696 |
|               | cAMP signaling pathway                                    | 0.24        | 0.000257517 |
|               | Central carbon metabolism in cancer                       | 0.166666667 | 0.00480409  |
|               | Circadian entrainment                                     | 0.222222222 | 0.043115854 |
|               | Citrate cycle (TCA cycle)                                 | 0.15        | 0.03785407  |
|               | Cocaine addiction                                         | 0.5         | 0.000122485 |
|               | D-Glutamine and D-glutamate metabolism                    | 0.230769231 | 0.011513745 |
|               | Dopaminergic synapse                                      | 0.333333333 | 0.00076927  |
|               | Endocrine and other factor-regulated calcium reabsorption | 0.25        | 0.034374409 |
|               | GABAergic synapse                                         | 0.333333333 | 0.003779352 |
|               | Gap junction                                              | 0.454545455 | 2.78068E-05 |
|               | Glucagon signaling pathway                                | 0.16        | 0.013420232 |
|               | Glutamatergic synapse                                     | 0.25        | 0.034374409 |
|               | Glutathione metabolism                                    | 0.210526316 | 6.39E-05    |
|               | Linoleic acid metabolism                                  | 0.25        | 5.79006E-05 |
|               | Long-term depression                                      | 0.222222222 | 0.043115854 |
|               | Long-term potentiation                                    | 0.285714286 | 0.026428534 |
|               | Lysine degradation                                        | 0.14        | 0.00243975  |
|               | Melanogenesis                                             | 0.333333333 | 0.01935331  |
|               | Neuroactive ligand-receptor interaction                   | 0.175       | 0.000623882 |
|               | Parkinson disease                                         | 0.2         | 0.005948848 |
|               | Pentose and glucuronate interconversions                  | 0.125       | 0.004692637 |
|               | Phenylalanine metabolism                                  | 0.133333333 | 0.001659043 |
|               | Primary bile acid biosynthesis                            | 0.106382979 | 0.0310226   |
|               | Prolactin signaling pathway                               | 0.272727273 | 0.007021576 |
|               | Purine metabolism                                         | 0.084210526 | 0.0261104   |
|               | Regulation of lipolysis in adipocytes                     | 0.214285714 | 0.014253945 |
|               | Retrograde endocannabinoid signaling                      | 0.157894737 | 0.033068287 |
|               | Serotonergic synapse                                      | 0.176470588 | 0.024514707 |
|               | Spinocerebellar ataxia                                    | 0.285714286 | 0.026428534 |
|               | Sulfur metabolism                                         | 0.121212121 | 0.034425978 |
|               | Taurine and hypotaurine metabolism                        | 0.136363636 | 0.048421524 |
|               | Tyrosine metabolism                                       | 0.115384615 | 0.002413175 |
|               | Vitamin digestion and absorption                          | 0.135135135 | 0.011895312 |
| SBP/mod<br>el | Alanine, aspartate and glutamate metabolism               | 0.142857143 | 0.0012815   |

|                      |                                             |             |             |
|----------------------|---------------------------------------------|-------------|-------------|
|                      | Arginine and proline metabolism             | 0.051282051 | 0.046737042 |
|                      | Biosynthesis of unsaturated fatty acids     | 0.057971014 | 0.03179253  |
|                      | Butanoate metabolism                        | 0.071428571 | 0.036403319 |
|                      | Central carbon metabolism in cancer         | 0.133333333 | 0.001670989 |
|                      | Citrate cycle (TCA cycle)                   | 0.15        | 0.004743603 |
|                      | Cysteine and methionine metabolism          | 0.063492063 | 0.023665189 |
|                      | GABAergic synapse                           | 0.222222222 | 0.010089855 |
|                      | Glucagon signaling pathway                  | 0.16        | 0.00082343  |
|                      | Glycolysis / Gluconeogenesis                | 0.096774194 | 0.016319325 |
|                      | HIF-1 signaling pathway                     | 0.133333333 | 0.027509229 |
|                      | Insulin resistance                          | 0.1         | 0.047076369 |
|                      | Insulin secretion                           | 0.166666667 | 0.017883476 |
|                      | Nicotinate and nicotinamide metabolism      | 0.072727273 | 0.015024581 |
|                      | Pantothenate and CoA biosynthesis           | 0.1         | 0.014923291 |
|                      | Pentose and glucuronate interconversions    | 0.089285714 | 0.0027031   |
|                      | Phenylalanine metabolism                    | 0.066666667 | 0.020137741 |
|                      | Regulation of lipolysis in adipocytes       | 0.142857143 | 0.024110003 |
|                      | Starch and sucrose metabolism               | 0.081081081 | 0.026198533 |
|                      | Terpenoid backbone biosynthesis             | 0.066666667 | 0.04337456  |
|                      | Tyrosine metabolism                         | 0.076923077 | 0.002177173 |
|                      | Valine, leucine and isoleucine biosynthesis | 0.173913043 | 0.000591691 |
|                      | Vascular smooth muscle contraction          | 0.153846154 | 0.020898901 |
| SBP-<br>BV/mode<br>1 | ABC transporters                            | 0.075268817 | 0.010132461 |
|                      | Adrenergic signaling in cardiomyocytes      | 0.2         | 0.026637033 |
|                      | African trypanosomiasis                     | 0.25        | 0.017147121 |
|                      | Alanine, aspartate and glutamate metabolism | 0.142857143 | 0.005562369 |
|                      | Alcoholism                                  | 0.2         | 0.026637033 |
|                      | Arginine biosynthesis                       | 0.130434783 | 0.021061222 |
|                      | beta-Alanine metabolism                     | 0.125       | 0.009022997 |
|                      | Caffeine metabolism                         | 0.136363636 | 0.018660755 |
|                      | cAMP signaling pathway                      | 0.2         | 0.000385768 |
|                      | Carbohydrate digestion and absorption       | 0.115384615 | 0.029232606 |
|                      | Central carbon metabolism in cancer         | 0.133333333 | 0.007154851 |
|                      | Choline metabolism in cancer                | 0.363636364 | 0.000125973 |
|                      | C-type lectin receptor signaling pathway    | 0.181818182 | 0.032009491 |
|                      | D-Glutamine and D-glutamate metabolism      | 0.153846154 | 0.043887603 |
|                      | Dopaminergic synapse                        | 0.166666667 | 0.037767476 |
|                      | GABAergic synapse                           | 0.333333333 | 0.001301446 |

|               |                                             |             |             |
|---------------|---------------------------------------------|-------------|-------------|
|               | Gap junction                                | 0.272727273 | 0.002460972 |
|               | Glucagon signaling pathway                  | 0.12        | 0.026347271 |
|               | Glutamatergic synapse                       | 0.25        | 0.017147121 |
|               | Glycerophospholipid metabolism              | 0.096153846 | 0.010842355 |
|               | Insulin secretion                           | 0.166666667 | 0.037767476 |
|               | Lysine degradation                          | 0.08        | 0.040538974 |
|               | Morphine addiction                          | 0.222222222 | 0.021674457 |
|               | Neuroactive ligand-receptor interaction     | 0.125       | 0.003508692 |
|               | Pantothenate and CoA biosynthesis           | 0.133333333 | 0.007154851 |
|               | Parkinson disease                           | 0.15        | 0.014342661 |
|               | Prolactin signaling pathway                 | 0.181818182 | 0.032009491 |
|               | Pyrimidine metabolism                       | 0.076923077 | 0.026458839 |
|               | Regulation of lipolysis in adipocytes       | 0.214285714 | 0.005128694 |
|               | Retrograde endocannabinoid signaling        | 0.157894737 | 0.012422856 |
|               | Vascular smooth muscle contraction          | 0.230769231 | 0.004106778 |
| Ato/mode<br>1 | ABC transporters                            | 0.064516129 | 0.009282183 |
|               | Alanine, aspartate and glutamate metabolism | 0.178571429 | 0.000176737 |
|               | Alcoholism                                  | 0.2         | 0.015571983 |
|               | Aminoacyl-tRNA biosynthesis                 | 0.096153846 | 0.003246337 |
|               | Arginine and proline metabolism             | 0.064102564 | 0.017816573 |
|               | Arginine biosynthesis                       | 0.173913043 | 0.000920834 |
|               | beta-Alanine metabolism                     | 0.09375     | 0.024176005 |
|               | Butanoate metabolism                        | 0.071428571 | 0.048721485 |
|               | cAMP signaling pathway                      | 0.12        | 0.012360172 |
|               | Central carbon metabolism in cancer         | 0.2         | 1.90652E-05 |
|               | Choline metabolism in cancer                | 0.181818182 | 0.0187925   |
|               | D-Glutamine and D-glutamate metabolism      | 0.153846154 | 0.025984924 |
|               | GABAergic synapse                           | 0.333333333 | 0.000565421 |
|               | Gap junction                                | 0.181818182 | 0.0187925   |
|               | Glucagon signaling pathway                  | 0.12        | 0.012360172 |
|               | Glutathione metabolism                      | 0.078947368 | 0.037835688 |
|               | Glycerophospholipid metabolism              | 0.076923077 | 0.018371866 |
|               | Histidine metabolism                        | 0.085106383 | 0.013022949 |
|               | Lysine degradation                          | 0.08        | 0.016092331 |
|               | Neuroactive ligand-receptor interaction     | 0.125       | 0.00098592  |
|               | Pantothenate and CoA biosynthesis           | 0.1         | 0.020347739 |
|               | Protein digestion and absorption            | 0.103448276 | 0.018569915 |
|               | Proximal tubule bicarbonate reclamation     | 0.117647059 | 0.043079732 |
|               | Regulation of lipolysis in adipocytes       | 0.142857143 | 0.029935247 |
|               | Renin secretion                             | 0.117647059 | 0.043079732 |
|               | Sulfur metabolism                           | 0.090909091 | 0.026226557 |

|                                             |             |             |
|---------------------------------------------|-------------|-------------|
| Taurine and hypotaurine metabolism          | 0.136363636 | 0.008630996 |
| Valine, leucine and isoleucine biosynthesis | 0.130434783 | 0.009787521 |
| Valine, leucine and isoleucine degradation  | 0.073170732 | 0.045869544 |
| Vascular smooth muscle contraction          | 0.153846154 | 0.025984924 |

**Supplementary Table S5:** The differential metabolites sharing the similar trends with normal group

| Groups    | Metabolites                                                                                                                                                                                                                                                                                                                                                                                                                                                                                                                                                                                                                                                                                                                                                                                                                                                                                                                                                                                                                                                                                                                                                                                                                                                                                     |
|-----------|-------------------------------------------------------------------------------------------------------------------------------------------------------------------------------------------------------------------------------------------------------------------------------------------------------------------------------------------------------------------------------------------------------------------------------------------------------------------------------------------------------------------------------------------------------------------------------------------------------------------------------------------------------------------------------------------------------------------------------------------------------------------------------------------------------------------------------------------------------------------------------------------------------------------------------------------------------------------------------------------------------------------------------------------------------------------------------------------------------------------------------------------------------------------------------------------------------------------------------------------------------------------------------------------------|
| SBP/model | 2-hydroxy-iminostilbene, D-Urobilin, PtdIns-(1,2-dioctanoyl) (sodium salt), Nebramycin factor 5', 3,4,5-trihydroxy-6-(5-hydroxy-4-{2-hydroxy-3-[4-hydroxy-3-(3-methylbut-2-en-1-yl)phenyl]propanoyl}-2-(3-methylbut-2-en-1-yl)phenoxy)oxane-2-carboxylic acid, D-Urobilinogen, Benfuresate, PC(16:1(9Z)/0:0)[U], 2',7-Dihydroxy-4'-methoxy-8-prenylflavan 2',7-diglucoside, 1-(2-methoxy-6Z-hexadecenyl)-sn-glycero-3-phosphoethanolamine, Bisindolylmaleimide IV, Hydromorphone, N1-Caffeoyl-N10-feruloylspermidine, PS(O-18:0/0:0), PC(8:2(2E,4E)/8:2(2E,4E)), 1-Methyluric acid, Tenovin-6, Farnesyl Alcohol Azide, 4-hydroxybenzeneacetic acid, N1,N10-Dicoumaroylspermidine, Chenodeoxycholic acid sulfate, Piperazine citrate, Sphinganine-phosphate, Ritodrine, Dinoflagellate luciferin, N-oleoyl threonine, 1,25-Dihydroxy-20S-21-(3-hydroxy-3-methylbutyl)-23-yne-26,27-hexafluorovitamin D3, Demissine, 2-Hexenoylcholine, Mesobilirubinogen, (3Z)-Phycoerythrobilin, Oxoglutaric acid, Integerrenine, Phenmedipham, eurysterol B sulfonic acid, 5beta-Cholestane-3alpha,7alpha,12alpha,24,26,27-hexol, OKOHA-PG, Kynurenic acid, Letrozole, azaperone, 5-((8Z,11Z)-nonadeca-8,11-dien-1-yl)resorcinol, Coproporphyrin I, Prasugrel, Kudzusaponin SA4, Piplartine, Adhumulinic acid, |

---

Norcocaine, Erysopine, 4-Hydroxybenzyl isothiocyanate 4"-acetylramnoside, 5-aminovaleric acid, 4-hydroxycyclohexylcarboxylic acid, Acetohexamide, Morphine, 3alpha,12alpha,22-Trihydroxy-5beta-cholestan-26-oic acid, Melilotigenin, 2-O-(beta-D-galactopyranosyl-(1->6)-beta-D-galactopyranosyl) 2S-hydroxyundecanoic acid, beta-Allocortolone, 9,10,13-TriHOME, alpha-N-(3-hydroxyhexadecanoyl) L-ornithine, LysoPE(14:1(9Z)/0:0), 3,6,12-Trioxo-5β-cholelan-24-oic Acid, 1,7-Dimethyluric acid, Mukoenine A, 3,17,20-trihydroxy-pregn-5-en-11-one, 3α,7α,12α,22-Tetrahydroxy-5β-cholestan-26-oic acid, Barogenin, 3-(3-hydroxyphenyl)-2-phenyl-4-[(E)-2-phenylethenyl]-2,3-dihydro-1-benzofuran-6-ol, 1-(2-methoxy-6Z-tetradecenyl)-sn-glycero-3-phosphoserine, Euscaphic acid, C17 Sphinganine, 3beta,6alpha-dihydroxy-5alpha-cholesta-9(11),24-dien-23-one, α-hydroxy Farnesyl Phosphonic Acid, Prazerigenin A, (R)-Shinanolone, dihydroergocornine, PS(14:0/0:0), Calcipotriol, Varanic acid, Secosterol-B, 2beta,7alpha,12alpha-Trihydroxy-3-oxo-5beta-cholelan-24-oic Acid, 2β,3α,7α,12α-Tetrahydroxy-5β-cholestan-26-oic acid, PS(15:0/0:0), 3α,7α-Dihydroxy-5β-cholest-24-en-26-oic acid, Beta-hydroxymyristic acid, 3alpha,7alpha,22S-trihydroxy-5alpha-cholestan-26-oic acid, LysoPE(16:1(9Z)/0:0), (17alpha,23S)-Epoxy-28,29-dihydroxy-27-norlanost-8-ene-3,24-dione, Carbaprostacyclin-biotin, Desmethylnortriptyline, 1alpha,25-Dihydroxy-previtamin D3, LysoPE(0:0/22:4(7Z,10Z,13Z,16Z)), 3alpha,12alpha,24R-Trihydroxy-5beta-cholestan-26-oic acid, Norprotriptyline, 5-Cholestene-3beta,7alpha,12alpha,25-tetrol, Dihomohydrocholic acid, Ergoline-8-methanol, 10-methoxy-, (8b)-, Dihomo-alpha-muricholic acid, Isoleucyl-Aspartate, Denticulaflavonol, 9-oxo-24-methylene-9,11-seco-cholest-5-en-

---

3beta,11-diol, 1beta,3alpha,7alpha,12alpha-Tetrahydroxy-5beta-cholestan-26-oic acid, Pennogenin, 6-hydroxysphingosine, 5beta-scymnol sulfate, 5-Hydroxymethyl tolterodine, alpha-Micropteroxanthin B, Isorhodeasapogenin, Hexadecyl ferulate, 2,6-octadienoylglycine, 7alpha-Hydroxy-3-oxo-4-cholestenoate, 6-Deoxodolichosterone, 2beta,3alpha,7alpha,12alpha-Tetrahydroxy-5beta-cholestan-26-oic acid, 7alpha,24-dihydroxycholest-4-en-3-one, Phytol, (5x,6x)-5,6-Epoxyergosta-7,22-dien-3-ol, (25R)-5beta-spirostan-1beta,3alpha-diol, zymosterol intermediate 1b, Gamabufogenin, 24-Hydroxyglabrolide, 7alpha,12alpha-dihydroxy-3-oxocholest-4-en-27-oic acid, 5beta-Chola-3,8(14),11-trien-24-oic Acid, Glutamylvaline, 1-(2-methoxy-13-methyl-6Z-tetradecenyl)-sn-glycero-3-phosphoethanolamine, Glycerophospho-N-Palmitoyl Ethanolamine, 20(17->12beta)-abeo-1alpha,25-dihydroxy-24-dihomo-21-norvitamin D3, 3alpha,7alpha,12alpha,24(S)-tetrahydroxy-5beta-cholestan-27-al, 3alpha,7alpha,12alpha,25-Tetrahydroxy-5beta-cholestane-24-one, Setariol, gamma-Glutamylleucine, Valyl-Glutamate, Cryptogenin, 3-Methyleneoxindole, gamma-Glutamylvaline, PE(18:1(9Z)/0:0), 7alpha,12alpha,26-Trihydroxy-5beta-cholestan-3-one, [(oxolan-2-yl)methoxy]sulfonic acid, LysoPE(18:1(9Z)/0:0), 3alpha,7alpha,12alpha,24-Tetrahydroxy-5alpha-cholestan-26-oic acid, 3-(2-hydroxyphenyl)oxirane-2-carbaldehyde, 2,4,6-Octatriyn-1-ol, (25S)-5alpha-cholestan-3beta,6alpha,8,15beta,16beta,26-hexol, 5-Aminopentanoic acid, 25-Hydroxyvitamin D3-26,23-lactol, 3a,6b,7b,12b-Tetrahydroxy-5b-cholanoic acid

SBP-BV/model 2-hydroxy-iminostilbene, D-Urobilin, PtdIns-(1,2-dioctanoyl) (sodium salt), Nebramycin factor 5', Bilirubin, INDOPROFEN, 3,4,5-trihydroxy-6-(5-hydroxy-4-{2-hydroxy-3-[4-hydroxy-3-(3-

methylbut-2-en-1-yl)phenyl]propanoyl}-2-(3-methylbut-2-en-1-yl)phenoxy)oxane-2-carboxylic acid, D-Urobilinogen, 2',7-Dihydroxy-4'-methoxy-8-prenylflavan 2',7-diglucoside, Harderoporphyrinogen, Benfuresate, PC(16:1(9Z)/0:0)[U], Americine, Hydromorphone, 1-(2-methoxy-6Z-hexadecenyl)-sn-glycero-3-phosphoethanolamine, Phenmedipham, 1-Methyluric acid, Biliverdin, W123, Leukotriene E3, Farnesyl Alcohol Azide, N1-Caffeoyl-N10-feruloylspermidine, 4-hydroxycyclohexylcarboxylic acid, PC(8:2(2E,4E)/8:2(2E,4E)), 5-((8Z,11Z)-nonadeca-8,11-dien-1-yl)resorcinol, OKOHA-PG, N1,N10-Dicoumaroylspermidine, (3Z)-Phycoerythrobilin, Ritodrine, azaperone, Integerrenine, Kynurenic acid, Oxoglutaric acid, LysoPE(0:0/20:1(11Z)), Chenodeoxycholic acid sulfate, Sphinganine-phosphate, Mesobilirubinogen, 5-NITRO-2-PHENYLPROPYLAMINO BENZOIC ACID [NPPB], N-trans-Feruloyloctopamine, N-oleoyl threonine, Dinoflagellate luciferin, 5beta-Cholestane-3alpha,7alpha,12alpha,24,26,27-hexol, 5-aminovaleric acid, eurysterol B sulfonic acid, Citpressine II, 3-epicholic acid, 2-Hexenoylcholine, 4-Hydroxybenzyl isothiocyanate 4"-acetylramnoside, Prasugrel, Acetohexamide, 3alpha,12alpha,22-Trihydroxy-5beta-cholestan-26-oic acid, Adhumulinic acid, Morphine, Letrozole, LysoPE(14:1(9Z)/0:0), Erysopine, 6β-Testosterone Enanthate, 1,7-Dimethyluric acid, 11'-Carboxy-gamma-chromanol, Coproporphyrin I, Melilotigenin, Norcocaine, beta-Allocortolone, Euscaphic acid, Piplartine, Hypercalin B, Kudzusaponin SA4, 1-(2-methoxy-6Z-tetradecenyl)-sn-glycero-3-phosphoserine, 3,6,12-Trioxo-5β-cholan-24-oic Acid, Clomipramine, Formononetin, 3α,7α,12α,22-Tetrahydroxy-5β-cholestan-26-oic acid, 3,17,20-trihydroxy-pregn-5-en-11-one,

TG(8:0/13:0/12:0), 2-monoolein, Barogenin, C17 Sphinganine, 2-O-(beta-D-galactopyranosyl-(1->6)-beta-D-galactopyranosyl) 2S-hydroxyundecanoic acid, (R)-Shinanolone, Mukoenine A, dihydroergocornine, Secosterol-B, Latanoprost (free acid), Phytol, 5-Cholestene-3beta,7alpha,12alpha,25-tetrol, PS(14:0/0:0), PS(15:0/0:0), 3alpha,7alpha-Dihydroxy-5beta-cholest-24-en-26-oic acid, alpha-N-(3-hydroxyhexadecanoyl) L-ornithine, 5b-Cholestane-3a,7a,12a,23S,25-pentol, Beta-hydroxymyristic acid, Varanic acid, Undecanoylcarnitine, 3beta,6alpha-dihydroxy-5alpha-cholesta-9(11),24-dien-23-one, (-)-8-(2-Carboxy-1-phenylethyl)-3,5,7-trihydroxyflavone delta-lactone, 2beta,3alpha,7alpha,12alpha-Tetrahydroxy-5beta-cholestan-26-oic acid, alpha-hydroxy Farnesyl Phosphonic Acid, L-Glutamine, Calcipotriol, 4,8 dimethylnonanoyl carnitine, Desmethylnortriptyline, 3alpha,12alpha,25-Trihydroxy-5beta-cholestan-7-one, 1alpha,25-Dihydroxy-previtamin D3, 3alpha,7alpha,22S-trihydroxy-5alpha-cholestan-26-oic acid, Pennogenin, (17alpha,23S)-Epoxy-28,29-dihydroxy-27-norlanost-8-ene-3,24-dione, Oxidized Oplophorus luciferin, 3alpha,12alpha,24R-Trihydroxy-5beta-cholestan-26-oic acid, Isoleucyl-Aspartate, 2beta,7alpha,12alpha-Trihydroxy-3-oxo-5beta-cholestan-24-oic Acid, Dihomo-alpha-muricholic acid, 7alpha-hydroxy-4-cholesten-3-one-d7, alpha-Microperoxanthin B, LysoPE(16:1(9Z)/0:0), 7alpha,24-dihydroxycholest-4-en-3-one, Carbaprostacyclin-biotin, Prazerigenin A, 13'-Carboxy-gammatacopherol, 6-Deoxodolichosterone, Glutamylvaline, 6-hydroxysphingosine, 1-(2-methoxy-13-methyl-6Z-tetradecenyl)-sn-glycero-3-phosphoethanolamine, 1beta,3alpha,7alpha,12alpha-Tetrahydroxy-5beta-cholestan-26-oic acid, 1-(2-methoxy-6Z-pentadecenyl)-sn-glycero-3-phosphoethanolamine,

Glycerophospho-N-Palmitoyl Ethanolamine, PE(0:0/18:2(9Z,12Z)), Ecabet, 2beta,3alpha,7alpha,12alpha-Tetrahydroxy-5beta-cholestan-26-oic acid, Schleicherastatin 5, (25R)-3beta-hydroxycholest-5-en-7-one-26-oate, Ergoline-8-methanol, 10-methoxy-, (8b)-, (25R)-5beta-spirostan-1beta,3alpha-diol, 7alpha-Hydroxy-3-oxo-4-cholestenoate, Isorhodeasapogenin, PE(18:1(9Z)/0:0), LysoPE(18:2(9Z,12Z)/0:0), 7alpha,12alpha-dihydroxy-3-oxocholest-4-en-27-oic acid, 2,22-Dideoxy-3-dehydroecdysone, 5beta-Chola-3,8(14),11-trien-24-oic Acid, N-palmitoyl serine, Gamabufogenin, PE(16:0/0:0), Valyl-Glutamate, Heneicosanoic acid, LysoPE(18:1(9Z)/0:0), 3alpha,7alpha,12alpha,25-Tetrahydroxy-5beta-cholestane-24-one, Setariol, Citrulline, Glycerol-3-galactoside, gamma-Glutamylleucine, [(oxolan-2-yl)methoxy]sulfonic acid, 7alpha,12alpha,26-Trihydroxy-5beta-cholestan-3-one, gamma-Glutamylvaline, 3-Methyleneoxindole, 3alpha,12alpha-Dihydroxy-5beta-cholest-24-en-26-oic acid, 3alpha,7alpha,12alpha,24-Tetrahydroxy-5alpha-cholestan-26-oic acid, 5-Aminopentanoic acid, Glutaminyglutamic acid, 2,4,6-Octatriyn-1-ol, 3-(2-hydroxyphenyl)oxirane-2-carbaldehyde, (25S)-5alpha-cholestan-3beta,6alpha,8,15beta,16beta,26-hexol, 3a,6b,7b,12b-Tetrahydroxy-5b-cholanoic acid, Armillarin, PC(20:1(11Z)/24:1(15Z))

Ato/model

PtdIns-(1,2-dioctanoyl) (sodium salt), D-Urobilin, INDOPROFEN, Nebramycin factor 5', Spiramycin II, 3,4,5-trihydroxy-6-(5-hydroxy-4-{2-hydroxy-3-[4-hydroxy-3-(3-methylbut-2-en-1-yl)phenyl]propanoyl}-2-(3-methylbut-2-en-1-yl)phenoxy)oxane-2-carboxylic acid, 2',7-Dihydroxy-4'-methoxy-8-prenylflavan 2',7-diglucoside, D-Urobilinogen, TG(8:0/8:0/a-13:0)[rac], Benfuresate, 2-Methyl-6-phytylhydroquinone, Americine, Hydromorphone,

---

(3Z)-Phycoerythrobilin, Biliverdin, Phenmedipham, 1-Methyluric acid, 6,7-Epoxy-3Z,9Z-tricosadiene, N1-Caffeoyl-N10-feruloylspermidine, Neryl propionate, PC(8:2(2E,4E)/8:2(2E,4E)), Farnesyl Alcohol Azide, 5-((8Z,11Z)-nonadeca-8,11-dien-1-yl)resorcinol, Dinoflagellate luciferin, Integerrenine, N1,N10-Dicoumaroylspermidine, LysoPE(0:0/20:1(11Z)), OKOHA-PG, Ritodrine, 1,25-Dihydroxy-20S-21-(3-hydroxy-3-methylbutyl)-23-yne-26,27-hexafluorovitamin D3, Tenovin-6, 11'-Carboxy-gamma-chromanol, Mesobilirubinogen, 4-hydroxycyclohexylcarboxylic acid, Adhumulinic acid, 5beta-Cholestane-3alpha,7alpha,12alpha,24,26,27-hexol, Euscaphic acid, Sphinganine-phosphate, N-oleoyl threonine, Kynurenic acid, azaperone, Coproporphyrin I, 3-Methyl-alpha-ionyl acetate, Letrozole, 5-NITRO-2-PHENYLPROPYLAMINO BENZOIC ACID [NPPB], Melilotigenin, Ricinoleic Acid methyl ester, 3,6,12-Trioxo-5beta-cholestan-24-oic Acid, LysoPE(14:1(9Z)/0:0), Calcitriol, Piplartine, Secosterol-B, 2-Hexenoylcholine, 5-aminovaleric acid, 6beta-Testosterone Enanthate, Citpressine II, Norcocaine, 3alpha,12alpha,22-Trihydroxy-5beta-cholestan-26-oic acid, Clomipramine, beta-Allocortolone, 1-(2-methoxy-6Z-tetradecenyl)-sn-glycero-3-phosphoserine, Prasugrel, Hypercalin B, 3-epicholic acid, Homodeoxycholic acid, Castasterone, Tokorogenin, eurysterol B sulfonic acid, 3beta-Hydroxy-5alpha,6alpha-epoxy-9-oxo-9,10-seco-5-cholest-7-en-11-al, 4-Hydroxybenzyl isothiocyanate 4"-acetylramnoside, Hippurin-1, C17 Sphinganine, Pennogenin, 3alpha,7alpha,12alpha,22-Tetrahydroxy-5beta-cholestan-26-oic acid, PS(14:0/0:0), 5-Cholestene-3beta,7alpha,12alpha,25-tetrol, Latanoprost (free acid), Barogenin, Oxoglutaric acid, Secasterone, Morphine, 25,26-dihydroxyvitamin D, 6-Deoxodolichosterone, 3alpha,7alpha-Dihydroxy-5beta-

---

cholest-24-en-26-oic acid, 5b-Cholestane-3a,7a,12a,23S,25-pentol, PS(15:0/0:0), Erysopine, 3,17,20-trihydroxy-pregn-5-en-11-one, Mukoenine A, Undecanoylcarnitine, Thymidine, sn-3-O-(geranylgeranyl)glycerol 1-phosphate, Carbaprostacyclin-biotin, 1alpha,25-Dihydroxy-previtamin D3, 13'-Carboxy-gammatocopherol, 1,7-Dimethyluric acid, (R)-Shinanolone, Formononetin, 7alpha,24-dihydroxycholest-4-en-3-one, dihydroergocornine, Varanic acid, Ornithine, 4,8 dimethylnonanoyl carnitine, 3alpha,12alpha,25-Trihydroxy-5beta-cholestan-7-one, Mycalamide A, (17alpha,23S)-Epoxy-28,29-dihydroxy-27-norlanost-8-ene-3,24-dione, (5x,6x)-5,6-Epoxyergosta-7,22-dien-3-ol, Tauroursolic acid, 3beta,6alpha-dihydroxy-5alpha-cholesta-9(11),24-dien-23-one, 9-oxo-24-methylene-9,11-seco-cholest-5-en-3beta,11-diol, 2-O-(beta-D-galactopyranosyl-(1->6)-beta-D-galactopyranosyl) 2S-hydroxyundecanoic acid, 5alpha-cholestanol, 2beta,3alpha,7alpha,12alpha-Tetrahydroxy-5beta-cholestan-26-oic acid, 2beta,7alpha,12alpha-Trihydroxy-3-oxo-5beta-cholan-24-oic Acid, Beta-hydroxymyristic acid, alpha-hydroxy Farnesyl Phosphonic Acid, Isorhodeasapogenin, (25R)-3beta-hydroxycholest-5-en-7-one-26-oate, 7alpha-hydroxy-4-cholesten-3-one-d7, 5beta-scyminol sulfate, 5-Cholestene-3beta,7alpha,12alpha,24,25-pentol, Calcipotriol, 3alpha,7alpha,22S-trihydroxy-5alpha-cholestan-26-oic acid, 3alpha,7beta,12alpha-Trihydroxy-6-oxo-5alpha-cholan-24-oic Acid, 20(17->12beta)-abeo-1alpha,25-dihydroxy-24-dihomo-21-norvitamin D3, (22E)-3alpha,7alpha,12alpha-Trihydroxy-5beta-chol-22-en-24-oic Acid, PE(0:0/18:2(9Z,12Z)), 3alpha,12alpha,24R-Trihydroxy-5beta-cholestan-26-oic acid, Dihomo-alpha-muricholic acid, alpha-Microperoxanthin B, Glycerophospho-N-Palmitoyl Ethanolamine, 1-(2-methoxy-13-methyl-6Z-tetradecenyl)-sn-glycero-3-phosphoethanolamine,

---

Denticulaflavonol, 1beta,3alpha,7alpha,12alpha-Tetrahydroxy-5beta-cholestan-26-oic acid, 3alpha,7alpha,12alpha,25-Tetrahydroxy-5beta-cholestane-24-one, LysoPE(18:2(9Z,12Z)/0:0), 7alpha-Hydroxy-3-oxo-4-cholestenoate, 2beta,3alpha,7alpha,12alpha-Tetrahydroxy-5beta-cholestan-26-oic acid, dolichyl diphosphate, Ecabet, (3,4,5,6-tetrahydroxyoxan-2-yl)methyl 4-hydroxybenzoate, Ergoline-8-methanol, 10-methoxy-, (8b)-, LysoPE(16:1(9Z)/0:0), 1-(2-methoxy-6Z-pentadecenyl)-sn-glycero-3-phosphoethanolamine, 5beta-Chola-3,8(14),11-trien-24-oic Acid, 5-L-Glutamyl-L-alanine, 2-aminoheptanedioic acid, Clitidine 5'-phosphate, 2,22-Dideoxy-3-dehydroecdysone, Gamabufogenin, Setariol, PE(16:0/0:0), Danazol, 7alpha,12alpha,26-Trihydroxy-5beta-cholestan-3-one, 7alpha,12alpha-dihydroxy-3-oxocholest-4-en-27-oic acid, Asitribin, PE(18:1(9Z)/0:0), Desmethylnortriptyline, 12a-Hydroxy-3-oxocholadienic acid, 3alpha,12alpha-Dihydroxy-5beta-chol-6-en-24-oic Acid, (25R)-5beta-spirostan-1beta,3alpha-diol, LysoPE(18:1(9Z)/0:0), N-palmitoyl serine, 3alpha,12alpha-Dihydroxy-5beta-cholest-24-en-26-oic acid, Nonadecanoic acid, 3alpha,7alpha,12alpha,24(S)-tetrahydroxy-5beta-cholestan-27-al, 3alpha,7alpha,12beta-Trihydroxy-11-oxo-5beta-cholan-24-oic Acid, [(oxolan-2-yl)methoxy]sulfonic acid, 3-Methyleneoxindole, Heneicosanoic acid, 3alpha,7alpha,12alpha,24-Tetrahydroxy-5alpha-cholestan-26-oic acid, 23S,25,26-Trihydroxyvitamin D3, D-Lysine, Asperagenin, CYCLOLEUCINE, 3-(2-hydroxyphenyl)oxirane-2-carbaldehyde, 2,4,6-Octatriyn-1-ol, 2-Hydroxycinnamic acid, L-Proline, Benzofuran, L-Isoleucine, (25S)-5alpha-cholestan-3beta,6alpha,8,15beta,16beta,26-hexol, L-Alloisoleucine, 3-Methyl sulfolene, THTC, 5-Aminopentanoic acid,

---

**Supplementary Table S6:** The overlapped pathways and the differential metabolites from these pathways

| Group                | Pathway                                     | Metabolites                                                                                                                    |
|----------------------|---------------------------------------------|--------------------------------------------------------------------------------------------------------------------------------|
| SBP/mo<br>del        | Alanine, aspartate and glutamate metabolism | Butanedioic acid, N-acetylaspartate, N-acetylaspartic acid, Oxoglutaric acid, Pyruvic acid                                     |
|                      | Arginine and proline metabolism             | 5-Aminopentanoic acid, 5-amino-pentanoic acid, 5-aminovaleric acid, L-Phosphoarginine, Pyrrole-2-carboxylic acid, Pyruvic acid |
|                      | Butanoate metabolism                        | Butanedioic acid, Oxoglutaric acid, Pyruvic acid                                                                               |
|                      | Central carbon metabolism in cancer         | Butanedioic acid, Glucose 6-phosphate, Oxoglutaric acid, Pyruvic acid                                                          |
|                      | Citrate cycle (TCA cycle)                   | Butanedioic acid, Oxoglutaric acid, Pyruvic acid                                                                               |
|                      | GABAergic synapse                           | Butanedioic acid, Oxoglutaric acid                                                                                             |
|                      | Glucagon signaling pathway                  | Butanedioic acid, Glucose-1-phosphate, Oxoglutaric acid, Pyruvic acid                                                          |
|                      | Pentose and glucuronate interconversions    | Digalacturonic acid, Glucose-1-phosphate, Oxoglutaric acid, Pyruvic acid, Xylonic acid                                         |
|                      | Phenylalanine metabolism                    | 3-hydroxyphenylacetic acid, 4-hydroxybenzeneacetic acid, Butanedioic acid, Pyruvic acid                                        |
|                      | Regulation of lipolysis in adipocytes       | Arachidonic acid, Palmitoylcarnitine                                                                                           |
| SBP-<br>BV/mod<br>el | Tyrosine metabolism                         | 3-hydroxyphenylacetic acid, 4-hydroxybenzeneacetic acid, Butanedioic acid, Hydroquinone, Palmitoylcarnitine, Pyruvic acid      |
|                      | ABC transporters                            | Adenosine, Digalacturonic acid, D-ribose, L-Glutamine, L-histidine, Taurine, Trehalose                                         |
|                      | Adrenergic signaling in cardiomyocytes      | DG(16:1(9Z)/18:2(9Z,12Z)/0:0), Palmitoylcarnitine                                                                              |
|                      | Alanine, aspartate and glutamate metabolism | Butanedioic acid, L-Glutamine, N-acetylaspartate, N-acetylaspartic acid, Oxoglutaric acid                                      |
|                      | Alcoholism                                  | Adenosine, Dopamine                                                                                                            |
|                      | Arginine biosynthesis                       | Citrulline, L-Glutamine, Oxoglutaric acid                                                                                      |
|                      | beta-Alanine                                | 3-ureidopropionate, L-histidine, Pantothenic                                                                                   |

|                                             |                                                                                                                                  |
|---------------------------------------------|----------------------------------------------------------------------------------------------------------------------------------|
| metabolism                                  | acid, Uracil                                                                                                                     |
| Caffeine metabolism                         | 1,7-Dimethyluric acid, 1-Methyluric acid, Xanthine                                                                               |
| cAMP signaling pathway                      | Adenosine, Butanedioic acid, DG(16:1(9Z)/18:2(9Z,12Z)/0:0), Dopamine, Palmitoylcarnitine                                         |
| Central carbon metabolism in cancer         | Butanedioic acid, Glucose 6-phosphate, L-Glutamine, Oxoglutaric acid                                                             |
| D-Glutamine and D-glutamate metabolism      | L-Glutamine, Oxoglutaric acid                                                                                                    |
| Dopaminergic synapse                        | DG(16:1(9Z)/18:2(9Z,12Z)/0:0), Dopamine                                                                                          |
| GABAergic synapse                           | Butanedioic acid, L-Glutamine, Oxoglutaric acid                                                                                  |
| Gap junction                                | DG(16:1(9Z)/18:2(9Z,12Z)/0:0), Dopamine, Palmitoylcarnitine                                                                      |
| Glucagon signaling pathway                  | Butanedioic acid, Glucose-1-phosphate, Oxoglutaric acid                                                                          |
| Glutamatergic synapse                       | DG(16:1(9Z)/18:2(9Z,12Z)/0:0), L-Glutamine                                                                                       |
| Lysine degradation                          | 5-Aminopentanoic acid, 5-amino-pentanoic acid, 5-aminovaleric acid, Butanedioic acid, L-2-hydroxyglutaric acid, Oxoglutaric acid |
| Neuroactive ligand-receptor interaction     | Adenosine, Dopamine, Morphine, Palmitoyl Ethanolamide, Taurine                                                                   |
| Parkinson disease                           | Adenosine, DG(16:1(9Z)/18:2(9Z,12Z)/0:0), Dopamine                                                                               |
| Prolactin signaling pathway                 | Dopamine, Glucose 6-phosphate                                                                                                    |
| Regulation of lipolysis in adipocytes       | Adenosine, DG(16:1(9Z)/18:2(9Z,12Z)/0:0), Palmitoylcarnitine                                                                     |
| Retrograde endocannabinoid signaling        | DG(16:1(9Z)/18:2(9Z,12Z)/0:0), Ethanolamine, PC(20:1(11Z)/24:1(15Z))                                                             |
| Ato/mod el                                  | Adenosine, Digalacturonic acid, L-Aspartic Acid, L-Glutamate, L-histidine, Taurine                                               |
| ABC transporters                            | Butanedioic acid, L-Aspartic Acid, L-Glutamate, N-acetylaspartate, N-acetylaspartic acid, Oxoglutaric acid                       |
| Alanine, aspartate and glutamate metabolism | Adenosine, L-Glutamate                                                                                                           |
| Alcoholism                                  | 5-Aminopentanoic acid, 5-amino-pentanoic acid, 5-aminovaleric acid, L-Glutamate, L-Phosphoarginine, L-Proline, Ornithine         |
| Arginine and proline metabolism             | L-Aspartic Acid, L-Glutamate, Ornithine, Oxoglutaric acid                                                                        |
| Arginine biosynthesis                       | L-Aspartic Acid, L-histidine, Pantothenic acid                                                                                   |
| beta-Alanine metabolism                     |                                                                                                                                  |

|                                         |                                                                                                                  |
|-----------------------------------------|------------------------------------------------------------------------------------------------------------------|
| Butanoate metabolism                    | Butanedioic acid, L-Glutamate, Oxoglutaric acid                                                                  |
| cAMP signaling pathway                  | Adenosine, Butanedioic acid, Palmitoylcarnitine                                                                  |
| Central carbon metabolism in cancer     | Butanedioic acid, Glucose 6-phosphate, L-Aspartic Acid, L-Glutamate, L-Proline, Oxoglutaric acid                 |
| D-Glutamine and D-glutamate metabolism  | L-Glutamate, Oxoglutaric acid                                                                                    |
| GABAergic synapse                       | Butanedioic acid, L-Glutamate, Oxoglutaric acid                                                                  |
| Gap junction                            | L-Glutamate, Palmitoylcarnitine                                                                                  |
| Glucagon signaling pathway              | Butanedioic acid, Glucose-1-phosphate, Oxoglutaric acid                                                          |
| Glutathione metabolism                  | 5-L-Glutamyl-L-alanine, L-Glutamate, Ornithine                                                                   |
| Lysine degradation                      | 5-Aminopentanoic acid, 5-amino-pentanoic acid, 5-aminovaleric acid, Butanedioic acid, D-Lysine, Oxoglutaric acid |
| Neuroactive ligand-receptor interaction | Adenosine, L-Aspartic Acid, L-Glutamate, Morphine, Taurine                                                       |
| Regulation of lipolysis in adipocytes   | Adenosine, Palmitoylcarnitine                                                                                    |
| Sulfur metabolism                       | Butanedioic acid, Homoserine, Taurine                                                                            |
| Taurine and hypotaurine metabolism      | L-Glutamate, Oxoglutaric acid, Taurine                                                                           |

---
